# Supplementary material for: The Type II Secreted Lipase/Esterase LesA is a Key Virulence Factor Required for Xylella fastidiosa Pathogenesis in Grapevines
Source: PubMed Central journal article supplement (PMC4709584; doi:10.1038/srep18598), 2016-01-12
Supplement: srep18598-s1.pdf [file srep18598-s1.pdf]

## Supplementary Information

The Type II Secreted Lipase/Esterase LesA is a Key Virulence Factor Required for *Xylella fastidiosa* Pathogenesis in Grapevines

Rafael Nascimento, Hossein Gouran, Sandeep Chakraborty, Hyrum Gillespie, Hebréia O. Almeida-Souza, Aye Tu, Basuthkar J. Rao, Paul A. Feldstein, George Bruening, Luiz R. Goulart, and Abhaya M. Dandekar.

## Supplementary Figures

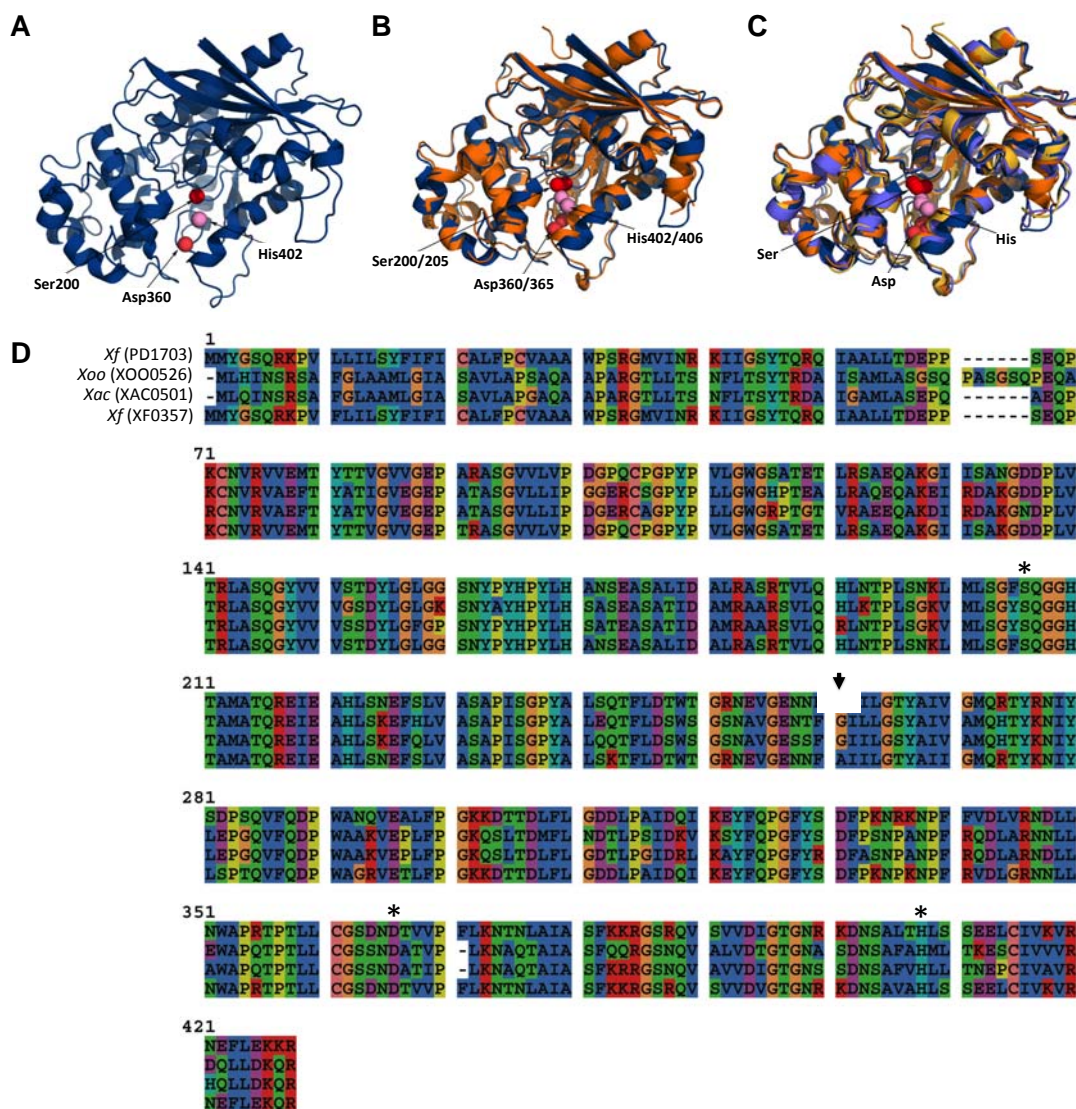

**Fig. S1:** *In silico* analysis of LesA. The structures for PD1703 (*X. fastidiosa* Temecula1), XF0357 (*X. fastidiosa* 9a5c) and XAC0501 (*Xac*, *Xanthomonas axonopodis* pv. citri) were predicted using GENO3D<sup>1</sup>. (A) The catalytic active triad in PD1703. The multiple superimpositions of these structures were obtained using MUSTANG<sup>2</sup>. (B) The alignment of 3H2G (XOO0526 from *Xanthomonas oryzae* pv. *oryzae*) and PD1703 (colored orange and blue, respectively). (C) The alignment of all four structures: 3H2G (XOO0526), PD1703, XF0357 and XAC0501 (colored orange, blue, slate and yellow, respectively). (D) The multiple sequence alignment for these proteins was generated using Clustal W<sup>3</sup>. The catalytic triad Ser-Asp-His is indicated by asterisks. In *Xf* strains, the residue Ala replaces the residue Gly-260 (indicated by a black arrow), which is required for the sugar ring positioning of the LipA-like carbohydrate-binding domain in *Xoo*<sup>4</sup>. The alignment image was generated using Seaview<sup>5</sup>.

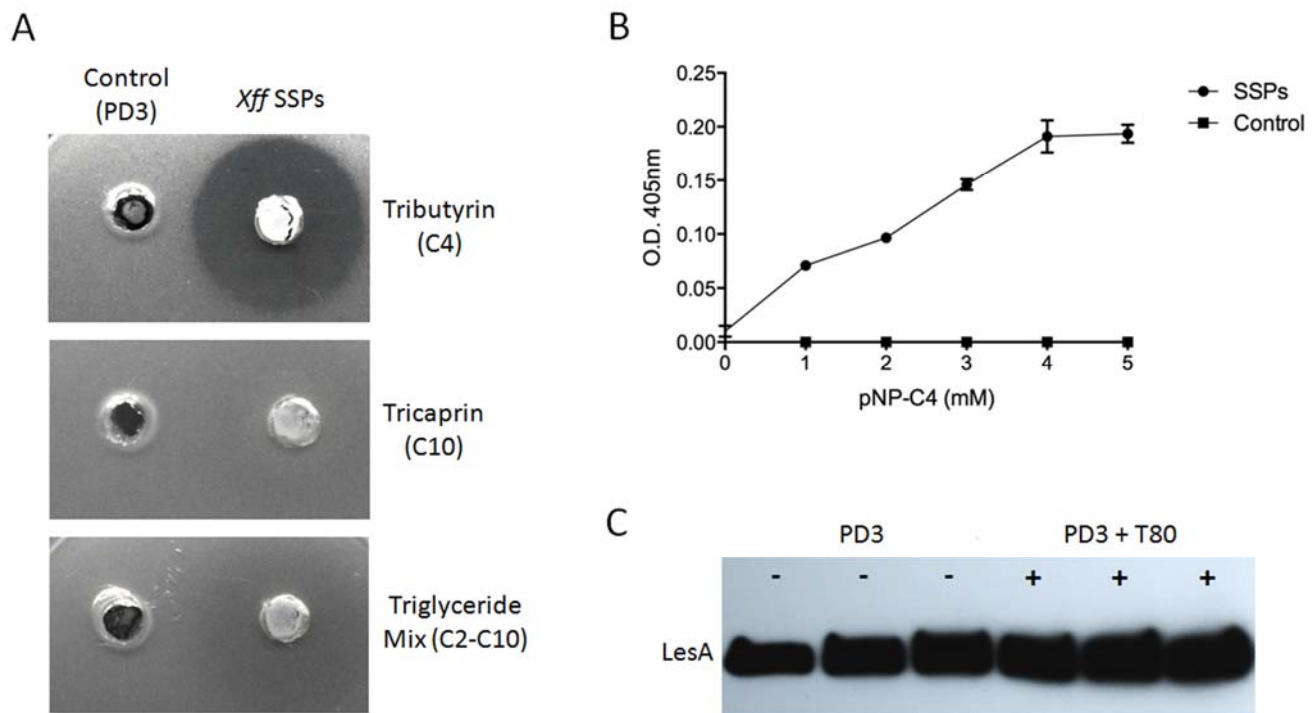

**Fig. S2:** *Xff* SSPs exhibit lipase/esterase activities. Triglycerides were incorporated into an agarose gel layer. Holes on the left received PD3 medium (control); holes on the right received *Xff* SSPs. **(A)** Presence of a zone of clearance indicates LesA activity on short-chain triacylglycerides (C4-Tributyrin), while no activity is seen on long-chain triacylglycerides (C10-Tricaprin). Weak activity is seen on a mixture of triglycerides that contains short- and long-chain triacylglycerides (C2-C10). **(B)** Esterase activity of *Xff* SPPs towards p-nitrophenol butyrate (pNP-C4) at 37°C in Tris-HCl, pH 7.5. A405 was measured after 10 min incubation with increasing concentrations of the substrate. **(C)** Induction *in vitro* of LesA protein expression by Tween 80 was accessed after growing *Xff* in PD3 cultures supplemented with 0.1% (v/v) Tween 80 (3 flasks/condition; growth until  $3 \times 10^8$  cells/mL) followed by LesA immunoblot detection.

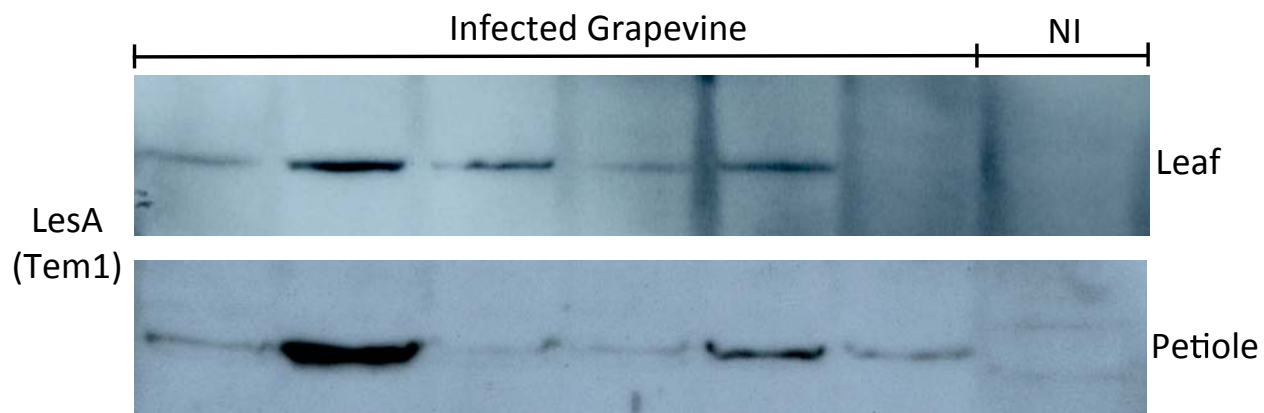

**Fig. S3:** Detection of LesA in grapevines infected with *Xff*. Leaf and petiole proteins extracted from *Xff*-infected (I; 12 wpi) and non-infected (NI) grapevines were used for detection of LesA by immunoblotting.

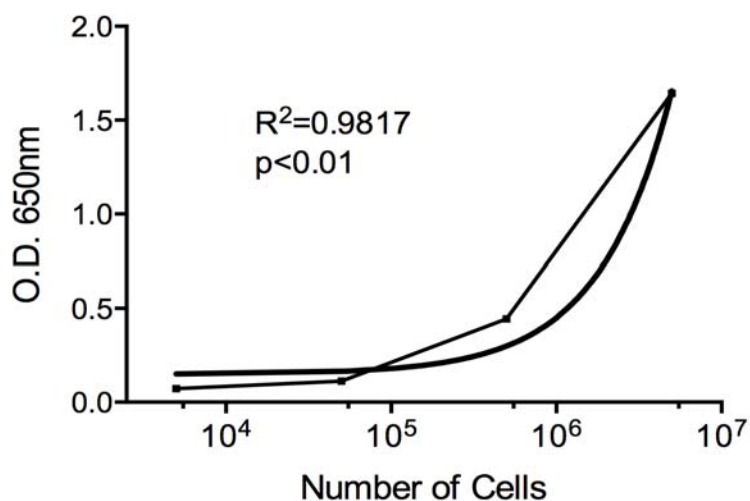

**Fig. S4:** Standard curve used for quantification of bacterial cells in grapevine leaf tissues by double-antibody sandwich (DAS)-ELISA assay.

**Table S1: List of *X. fastidiosa* Temecula 1 proteins identified in the surfaceome (cell shaving) analysis.**

| Accession number <sup>1</sup> | Protein description                            | Gene name | SSP | OMV | OM | Prot. local. <sup>2</sup> | Theor. Mw <sup>3</sup> | Sequence coverage | Matched peptides |
|-------------------------------|------------------------------------------------|-----------|-----|-----|----|---------------------------|------------------------|-------------------|------------------|
| Q87DF4                        | Outer membrane protein XadA                    | PD0731    | √   | √   | -  | U                         | 97.5                   | 12.10%            | 12               |
| Q87BD1                        | Peptidyl-prolyl cis-trans isomerase            | PD1525    | -   | -   | √  | OM                        | 25.0                   | 25.40%            | 6                |
| Q87AW0                        | Putative uncharacterized protein               | PD1703    | √   | √   | -  | U                         | 42.4                   | 20.40%            | 9                |
| Q87BC0                        | 60 kDa chaperonin                              | PD1538    | -   | -   | √  | C                         | 57.7                   | 9.32%             | 6                |
| Q87DY9                        | Putative uncharacterized protein               | PD0540    | √   | -   | √  | U                         | 15.2                   | 11.60%            | 2                |
| Q87A98                        | Succinyl-CoA ligase [ADP-forming] subunit beta | PD1930    | -   | -   | √  | C                         | 41.0                   | 10.60%            | 4                |
| Q87BM1                        | Bacteriocin                                    | PD1427    | √   | √   | -  | EC                        | 150.3                  | 2.55%             | 4                |
| Q87BZ7                        | Putative uncharacterized protein               | PD1299    | √   | -   | -  | U                         | 55.7                   | 5.73%             | 3                |
| Q87A38                        | Temperature acclimation protein B              | PD1993    | -   | -   | √  | C                         | 8.0                    | 38.40%            | 3                |
| Q87BK3                        | UTP-glucose-1-phosphate uridylyltransferase    | PD1450    | -   | -   | √  | C                         | 32.6                   | 5.74%             | 2                |
| P66380                        | 30S ribosomal protein S12                      | PD1999    | -   | -   | √  | C                         | 13.6                   | 14.50%            | 2                |
| Q87A29                        | 50S ribosomal protein L1                       | PD2004    | -   | -   | √  | C                         | 24.3                   | 9.48%             | 2                |
| Q87D30                        | Peptidyl-dipeptidase                           | PD0856    | √   | -   | √  | C                         | 77.6                   | 4.51%             | 3                |
| Q87AA4                        | Fimbrial protein                               | PD1924    | -   | √   | √  | EC                        | 15.3                   | 7.43%             | 2                |
| P66349                        | 30S ribosomal protein S10                      | PD0436    | -   | -   | √  | C                         | 11.5                   | 10.70%            | 2                |
| Q87D28                        | Putative uncharacterized protein               | PD0858    | -   | -   | -  | U                         | 18.5                   | 12.20%            | 2                |
| P66605                        | 30S ribosomal protein S6                       | PD1945    | -   | -   | √  | C                         | 16.4                   | 6.29%             | 1                |
| P63774                        | 10 kDa chaperonin                              | PD1537    | -   | -   | √  | C                         | 10.0                   | 15.80%            | 2                |
| Q87ER8                        | Putative uncharacterized protein               | PD0230    | -   | -   | √  | U                         | 12.5                   | 9.09%             | 1                |
| Q87A33                        | DNA-directed RNA polymerase subunit beta'      | PD2000    | -   | -   | √  | C                         | 155.8                  | 1.56%             | 2                |
| Q87A00                        | Oxidoreductase                                 | PD2039    | -   | -   | √  | U                         | 80.5                   | 2.08%             | 2                |
| Q87A31                        | 50S ribosomal protein L7/L12                   | PD2002    | -   | -   | √  | U                         | 12.7                   | 14.80%            | 2                |
| Q87AV4                        | Outer membrane protein MopB                    | PD1709    | √   | √   | √  | OM                        | 42.3                   | 3.08%             | 1                |
| Q877P8                        | Elongation factor Tu                           | PD1996    | -   | -   | √  | C                         | 42.9                   | 1.52%             | 1                |
| Q87CB5                        | Peptidyl-prolyl cis-trans isomerase            | PD1168    | -   | -   | √  | OM                        | 24.8                   | 6.90%             | 1                |
| Q87E60                        | 30S ribosomal protein S4                       | PD0460    | -   | -   | √  | C                         | 23.4                   | 4.33%             | 1                |
| Q87E05                        | Phosphoenolpyruvate synthase                   | PD0524    | -   | -   | √  | C                         | 87.3                   | 1.00%             | 1                |

1: Protein accession number at UniProt Knowledgebase (UniProtKB; <http://www.uniprot.org/>);

2: Protein localization as predicted by PSORTb v. 3.0.2 Subcellular Localization Prediction Tool (<http://www.psorth.org/psorth/>);

C: Cytoplasmic; OM: Outer Membrane; EC: Extracellular; U: Unknown);

3: Theoretical protein molecular weight shown in kDa.

**Table S2: List of *X. fastidiosa* Temecula 1 proteins identified in the outer membrane proteomic analysis.**

| Accession number <sup>1</sup> | Protein description                        | Gene name | Prot. local. <sup>2</sup> | Theor. Mw <sup>3</sup> | Sequence coverage | Matched peptides |
|-------------------------------|--------------------------------------------|-----------|---------------------------|------------------------|-------------------|------------------|
| 28199417                      | 60 kDa chaperonin                          | groL      | C                         | 58                     | 97.8              | 66               |
| 28199862                      | Elongation factor Tu                       | tufA      | C                         | 43                     | 86.1              | 32               |
| 28199584                      | Outer membrane protein                     | mopB      | OM                        | 42                     | 49.3              | 25               |
| 28199254                      | Chaperone protein                          | dnaK      | C                         | 68                     | 58.3              | 32               |
| 28198761                      | Peptidyl-dipeptidase                       | dcp       | C                         | 78                     | 48.7              | 26               |
| 28199866                      | DNA-directed RNA polymerase subunit beta'  | rpoC      | C                         | 156                    | 41.3              | 41               |
| 28199169                      | TonB-dependent receptor                    | PD1283    | OM                        | 103                    | 42.9              | 27               |
| 28199863                      | Elongation factor G                        | fusA      | C                         | 78                     | 44.2              | 21               |
| 28199337                      | 30S ribosomal protein S1                   | rpsA      | C                         | 62                     | 46.2              | 17               |
| 28199830                      | Outer membrane export factor               | tolC      | OM                        | 49                     | 55.5              | 20               |
| 28199867                      | DNA-directed RNA polymerase subunit beta   | rpoB      | C                         | 155                    | 24.5              | 20               |
| 28198797                      | Outer membrane protein P6 precursor        | PD0895    | OM                        | 21                     | 44.3              | 11               |
| 28198239                      | Putative uncharacterized protein           | PD0318    | OM                        | 111                    | 23.0              | 18               |
| 28198193                      | Polyphosphate-selective porin O            | oprO      | OM                        | 44                     | 41.6              | 15               |
| 28198133                      | ATP-dependent RNA helicase                 | deaD      | C                         | 68                     | 43.0              | 16               |
| 28198042                      | Leucyl aminopeptidase                      | pepA      | C                         | 52                     | 43.1              | 13               |
| 28199166                      | Low molecular weight heat shock protein    | hspA      | U                         | 18                     | 73.7              | 9                |
| 28198164                      | Bifunctional aconitate hydratase 2         | acnB      | C                         | 94                     | 27.5              | 16               |
| 28199416                      | 10 kDa chaperonin                          | groS      | C                         | 10                     | 85.2              | 10               |
| 28199827                      | 30S ribosomal protein S2                   | rpsB      | C                         | 29                     | 50.0              | 11               |
| 28198356                      | 50S ribosomal protein L2                   | rplB      | C                         | 30                     | 41.8              | 10               |
| 28199449                      | Metallopeptidase                           | PD1570    | P                         | 78                     | 32.7              | 14               |
| 28198247                      | Outer membrane antigen                     | oma       | OM                        | 88                     | 21.0              | 13               |
| 28199468                      | TonB-dependent receptor                    | btuB      | OM                        | 114                    | 31.9              | 17               |
| 28198925                      | Putative uncharacterized protein           | PD1028    | U                         | 25                     | 51.8              | 7                |
| 28199864                      | 30S ribosomal protein S7                   | rpsG      | C                         | 17                     | 49.6              | 13               |
| 28198126                      | Polynucleotide phosphorylase/polyadenylase | pnp       | C                         | 76                     | 24.8              | 14               |
| 28199507                      | HflK protein                               | hflk      | U                         | 41                     | 45.1              | 11               |
| 28198196                      | Heat shock protein 90                      | htpG      | C                         | 72                     | 31.7              | 12               |
| 28199868                      | 50S ribosomal protein L7/L12               | rplL      | U                         | 13                     | 57.3              | 11               |
| 28198158                      | Putative uncharacterized protein           | PD0230    | U                         | 13                     | 91.7              | 9                |
| 28198376                      | 30S ribosomal protein S4                   | rpsD      | C                         | 23                     | 58.6              | 10               |

|          |                                                |        |    |     |      |    |
|----------|------------------------------------------------|--------|----|-----|------|----|
| 28198666 | Alpha-ketoglutarate decarboxylase              | odhA   | C  | 105 | 23.3 | 13 |
| 28198122 | Translation initiation factor IF-2             | infB   | C  | 97  | 30.6 | 19 |
| 28199900 | Oxidoreductase                                 | PD2039 | U  | 81  | 24.0 | 11 |
| 28198665 | Dihydrolipoamide acetyltransferase             | sucB   | C  | 42  | 28.9 | 10 |
| 28199714 | Fructose-bisphosphate aldolase                 | PD1845 | C  | 36  | 41.6 | 8  |
| 28198359 | 30S ribosomal protein S3                       | rpsC   | C  | 27  | 49.0 | 10 |
| 28199904 | Protease IV                                    | sppA   | CM | 69  | 23.5 | 10 |
| 28199497 | Serine/threonine protein kinase                | PD1620 | OM | 43  | 40.5 | 9  |
| 28198377 | DNA-directed RNA polymerase subunit alpha      | rpoA   | C  | 37  | 44.3 | 13 |
| 28199574 | OmpA family protein                            | ompA   | OM | 26  | 61.2 | 11 |
| 28198344 | ATP synthase subunit beta                      | atpD   | C  | 51  | 43.8 | 13 |
| 28198365 | 50S ribosomal protein L5                       | rplE   | C  | 20  | 58.1 | 10 |
| 28199791 | Fimbrial protein                               | pilA   | EC | 15  | 78.4 | 9  |
| 28199622 | Putative ABC transporter ATP-binding protein   | PD1751 | C  | 62  | 24.5 | 11 |
| 77747677 | Ketol-acid reductoisomerase                    | ilvC   | C  | 39  | 46.6 | 10 |
| 28199859 | Temperature acclimation protein B              | PD1993 | C  | 8   | 87.7 | 6  |
| 28199798 | Succinyl-CoA synthetase subunit alpha          | sucD   | C  | 30  | 62.8 | 11 |
| 28198651 | Subunit C of alkyl hydroperoxide reductase     | ahpC   | C  | 21  | 53.2 | 8  |
| 28198689 | Precursor of drug resistance protein           | acrA   | U  | 44  | 41.7 | 9  |
| 28199797 | Succinyl-CoA ligase [ADP-forming] subunit beta | sucC   | C  | 41  | 29.7 | 8  |
| 28198385 | Trigger factor                                 | tig    | C  | 48  | 23.0 | 7  |
| 28198007 | Cell division protein                          | hflB   | CM | 71  | 17.8 | 6  |
| 28199726 | Protein translocase subunit secA               | secA   | C  | 103 | 15.3 | 9  |
| 28199849 | Ribonuclease E                                 | rne    | U  | 126 | 15.1 | 8  |
| 28199810 | 50S ribosomal protein L9                       | rplI   | C  | 16  | 57.7 | 4  |
| 28198614 | Virulence regulator                            | PD0708 | C  | 16  | 61.6 | 5  |
| 28199748 | Lipase/esterase                                | estA   | OM | 64  | 29.0 | 10 |
| 28198477 | Septum site-determining protein                | minD   | C  | 29  | 78.1 | 13 |
| 28198269 | Succinate dehydrogenase flavoprotein subunit   | sdhA   | CM | 65  | 14.3 | 6  |
| 28199826 | Elongation factor Ts                           | tsf    | C  | 31  | 39.4 | 8  |
| 28199039 | Twitching motility protein                     | pilT   | C  | 38  | 36.0 | 10 |
| 28199506 | Integral membrane proteinase                   | hflC   | U  | 32  | 32.8 | 7  |
| 28197955 | Biopolymer transport ExbB protein              | exbB   | CM | 27  | 28.3 | 6  |
| 28199627 | Hypothetical protein                           | PD1756 | OM | 34  | 35.8 | 7  |
| 28199090 | ABC transporter phosphate binding protein      | pstS   | U  | 39  | 26.4 | 6  |

|          |                                                        |        |    |    |      |    |
|----------|--------------------------------------------------------|--------|----|----|------|----|
| 28199405 | Peptidyl-prolyl cis-trans isomerase                    | PD1525 | OM | 25 | 53.0 | 10 |
| 28199549 | Bacterioferritin                                       | bfr    | C  | 18 | 54.5 | 6  |
| 28199381 | 3-oxoacyl-(acyl carrier protein) synthase II           | fabB   | CM | 43 | 46.5 | 9  |
| 28198372 | 50S ribosomal protein L15                              | rplO   | C  | 15 | 53.1 | 6  |
| 28199723 | Putative uncharacterized protein                       | PD1854 | U  | 23 | 29.9 | 5  |
| 28199057 | UDP-glucose dehydrogenase                              | ugd    | C  | 50 | 26.9 | 9  |
| 28198353 | 50S ribosomal protein L3                               | rplC   | C  | 23 | 38.1 | 6  |
| 28198346 | ATP synthase subunit alpha                             | atpA   | C  | 56 | 22.3 | 7  |
| 28199146 | Enolase                                                | eno    | U  | 46 | 30.5 | 7  |
| 77747646 | Phosphoenolpyruvate synthase                           | ppsA   | C  | 87 | 25.8 | 13 |
| 28198403 | Glutathione S-transferase                              | gst    | C  | 23 | 48.3 | 6  |
| 28198480 | Putative uncharacterized protein                       | PD0570 | OM | 44 | 20.0 | 7  |
| 28198937 | Organic hydroperoxide resistance protein               | ohr    | C  | 15 | 67.8 | 8  |
| 28198389 | Histone-like protein                                   | hup    | C  | 10 | 76.6 | 5  |
| 28198923 | Glutamine synthetase                                   | glnA   | C  | 52 | 25.4 | 7  |
| 77747643 | GTP-binding elongation factor protein                  | typA   | CM | 68 | 21.4 | 9  |
| 28199916 | Transcription termination factor Rho                   | rho    | C  | 48 | 18.5 | 6  |
| 28198370 | 30S ribosomal protein S5                               | rpsE   | C  | 19 | 45.8 | 6  |
| 28199872 | Transcription antitermination protein nusG             | nusG   | C  | 21 | 58.9 | 7  |
| 28199293 | Glutaredoxin-like protein                              | grx    | C  | 33 | 28.6 | 6  |
| 28199554 | Two-component system, regulatory protein               | popP   | C  | 25 | 27.8 | 5  |
| 28198378 | 50S ribosomal protein L17                              | rplQ   | C  | 14 | 50.0 | 6  |
| 28199609 | Putative uncharacterized protein                       | PD1736 | U  | 18 | 44.0 | 5  |
| 28198663 | Peptidoglycan-associated outer membrane lipoprotein    | pcp    | OM | 16 | 34.0 | 4  |
| 28198177 | NADH dehydrogenase subunit G                           | nuoG   | C  | 80 | 16.4 | 7  |
| 28199869 | 50S ribosomal protein L10                              | rplJ   | C  | 19 | 36.6 | 4  |
| 28198354 | 50S ribosomal protein L4                               | rplD   | C  | 22 | 46.5 | 7  |
| 28199172 | Periplasmic protease                                   | mucD   | P  | 54 | 25.1 | 7  |
| 28198021 | 50S ribosomal protein L19                              | rplS   | C  | 15 | 50.7 | 6  |
| 28198032 | Carbon storage regulator homolog                       | csrA   | U  | 8  | 63.4 | 3  |
| 28199870 | 50S ribosomal protein L1                               | rplA   | C  | 24 | 35.8 | 4  |
| 28198140 | Phosphomannose isomerase-GDP-mannose pyrophosphorylase | xanB   | C  | 51 | 18.0 | 5  |
| 28198657 | 30S ribosomal protein S9                               | rpsI   | C  | 14 | 52.3 | 5  |
| 28199329 | Inosine-5'-monophosphate dehydrogenase                 | guaB   | C  | 52 | 16.3 | 4  |



|           |                                                                       |        |    |     |      |   |
|-----------|-----------------------------------------------------------------------|--------|----|-----|------|---|
| 28199917  | Isocitrate dehydrogenase [NADP]                                       | icd    | C  | 81  | 16.7 | 6 |
| 28198121  | Transcription elongation factor nusA                                  | nusA   | C  | 56  | 12.5 | 5 |
| 28198753  | Chemotaxis-related protein kinase                                     | cheA   | C  | 195 | 4.4  | 5 |
| 28198661  | cAMP-regulatory protein                                               | clp    | C  | 26  | 29.7 | 5 |
| 28198400  | 50S ribosomal protein L28                                             | rpmB   | C  | 9   | 48.7 | 5 |
| 28198149  | 6-phosphofructokinase                                                 | pfkA   | C  | 47  | 26.9 | 7 |
| 28199331  | UTP-glucose-1-phosphate uridylyltransferase                           | gtaB   | C  | 33  | 19.3 | 4 |
| 28198467  | Rod shape-determining protein                                         | mreB   | C  | 39  | 33.4 | 8 |
| 28199586  | TonB-dependent receptor                                               | PD1711 | OM | 98  | 14.1 | 9 |
| 28199680  | Dihydrolipoamide acetyltransferase                                    | pdhB   | C  | 58  | 13.8 | 5 |
| 28198358  | 50S ribosomal protein L22                                             | rplV   | C  | 12  | 50.5 | 5 |
| 28198688  | Multidrug-efflux transporter                                          | acrF   | CM | 114 | 8.2  | 7 |
| 28199503  | Glyceraldehyde-3-phosphate dehydrogenase                              | gapA   | C  | 36  | 30.4 | 5 |
| 28198367  | 30S ribosomal protein S8                                              | rpsH   | C  | 14  | 38.6 | 5 |
| 28197993  | Signal recognition particle protein                                   | ffh    | CM | 50  | 20.4 | 6 |
| 28198752  | Pilus biogenesis protein                                              | pilJ   | CM | 74  | 16.0 | 7 |
| 28198338  | Tryptophan repressor binding protein                                  | wrbA   | U  | 20  | 22.2 | 4 |
| 28198364  | 50S ribosomal protein L24                                             | rplX   | C  | 11  | 44.8 | 6 |
| 77747670  | Thiamine biosynthesis protein                                         | thiC   | C  | 66  | 13.1 | 5 |
| 28199786  | Two-component system, regulatory protein                              | colR   | C  | 25  | 24.9 | 3 |
| 28198352  | 30S ribosomal protein S10                                             | rpsJ   | C  | 12  | 31.1 | 3 |
| 28199201  | Chromosome-partitioning protein                                       | parB   | C  | 34  | 15.2 | 3 |
| 28199877  | 50S ribosomal protein L25                                             | rplY   | C  | 23  | 30.0 | 4 |
| 28198018  | 30S ribosomal protein S16                                             | rpsP   | C  | 10  | 58.1 | 5 |
| 28199194  | 5-methyltetrahydropteroyltriglutamate--homocysteine methyltransferase | metE   | C  | 86  | 9.9  | 4 |
| 28198141  | Phosphoglucomutase                                                    | xanA   | C  | 49  | 23.6 | 6 |
| 28199678  | Outer membrane protein                                                | ompW   | OM | 23  | 32.6 | 4 |
| 161484696 | Aconitate hydratase                                                   | rpfA   | C  | 101 | 7.6  | 4 |
| 28199621  | Serine hydroxymethyltransferase                                       | glyA   | C  | 45  | 18.9 | 6 |
| 28199385  | Pyruvate dehydrogenase E1 component                                   | aceE   | C  | 100 | 14.8 | 9 |
| 28198233  | Putative uncharacterized protein                                      | PD0312 | P  | 10  | 50.0 | 2 |
| 28198174  | NADH dehydrogenase subunit D                                          | nuoD   | C  | 49  | 11.0 | 3 |
| 28198112  | Preprotein translocase subunit SecD                                   | secD   | CM | 68  | 6.6  | 3 |
| 28198125  | 30S ribosomal protein S15                                             | rpsO   | C  | 10  | 46.5 | 4 |

|          |                                                          |        |    |     |      |   |
|----------|----------------------------------------------------------|--------|----|-----|------|---|
| 77747692 | GumK protein                                             | gumK   | C  | 31  | 24.6 | 4 |
| 28198655 | 50S ribosomal protein L31 type B                         | rpmE2  | U  | 9   | 63.8 | 4 |
| 28199865 | 30S ribosomal protein S12                                | rpsL   | C  | 14  | 37.9 | 3 |
| 28197947 | DNA polymerase III subunit beta                          | dnaN   | C  | 42  | 15.6 | 4 |
| 28198567 | Thiol:disulfide interchange protein                      | dsbA   | P  | 28  | 24.6 | 5 |
| 28198030 | Recombinase A                                            | recA   | C  | 38  | 18.2 | 4 |
| 28198270 | Succinate dehydrogenase iron-sulfur protein              | sdhB   | CM | 30  | 16.1 | 2 |
| 28198450 | Putative uncharacterized protein                         | PD0540 | U  | 15  | 43.8 | 4 |
| 28199283 | Isopropylmalate isomerase large subunit                  | leuC   | C  | 51  | 11.4 | 3 |
| 28199536 | Lipoprotein precursor                                    | vacJ   | OM | 39  | 13.1 | 4 |
| 28198316 | Carbamoyl phosphate synthase large subunit               | carB   | U  | 117 | 7.7  | 4 |
| 28198298 | Phage-related protein                                    | PD0381 | U  | 11  | 55.9 | 4 |
| 28198363 | 50S ribosomal protein L14                                | rplN   | C  | 13  | 34.4 | 6 |
| 28199812 | 30S ribosomal protein S6                                 | rpsF   | C  | 16  | 33.6 | 4 |
| 28198387 | ATP-dependent protease ATP-binding subunit               | clpX   | C  | 47  | 19.2 | 5 |
| 28198664 | Dihydrolipoamide dehydrogenase                           | lpd    | C  | 51  | 9.4  | 3 |
| 28199926 | TonB-dependent receptor                                  | cirA   | OM | 96  | 5.8  | 3 |
| 28198360 | 50S ribosomal protein L16                                | rplP   | C  | 15  | 27.7 | 3 |
| 28199722 | Zinc protease                                            | PD1853 | P  | 106 | 6.8  | 4 |
| 28199094 | Phosphate regulon transcriptional regulator              | phoU   | C  | 27  | 10.8 | 2 |
| 28198033 | Oligopeptidase A                                         | prlC   | C  | 76  | 7.3  | 3 |
| 28199633 | Methionyl-tRNA formyltransferase                         | fmt    | C  | 33  | 15.6 | 3 |
| 28198097 | Phosphoribosylaminoimidazole-succinocarboxamide synthase | purC   | C  | 34  | 17.2 | 3 |
| 28198774 | Superoxide dismutase (Mn)                                | sodA   | P  | 26  | 25.7 | 4 |
| 28198348 | ATP synthase subunit b                                   | atpF   | CM | 17  | 31.4 | 3 |
| 28198428 | Putative uncharacterized protein                         | PD0518 | U  | 179 | 2.4  | 3 |
| 28198416 | Putative uncharacterized protein                         | PD0504 | U  | 14  | 19.4 | 3 |
| 28198374 | 30S ribosomal protein S13                                | rpsM   | C  | 14  | 34.7 | 4 |
| 28198334 | TldD protein                                             | tldD   | C  | 51  | 9.1  | 3 |
| 28199839 | Isocitrate dehydrogenase                                 | icdA   | C  | 36  | 27.5 | 6 |
| 28198362 | 30S ribosomal protein S17                                | rpsQ   | C  | 10  | 39.3 | 3 |
| 28198195 | Malic enzyme                                             | maeB   | C  | 83  | 5.9  | 2 |
| 28199783 | Threonyl-tRNA synthetase                                 | thrS   | C  | 73  | 11.3 | 4 |
| 28198563 | Glutamate-cysteine ligase precursor                      | gshI   | C  | 51  | 9.7  | 4 |

|          |                                                          |        |    |    |      |   |
|----------|----------------------------------------------------------|--------|----|----|------|---|
| 28199282 | Isopropylmalate isomerase small subunit                  | leuD   | C  | 24 | 27.4 | 4 |
| 28198573 | ATP-dependent Clp protease subunit                       | clpA   | C  | 84 | 4.4  | 2 |
| 28199612 | Bacterioferritin comigratory protein                     | bcp    | U  | 18 | 30.2 | 4 |
| 28198746 | Glycyl-tRNA synthetase beta subunit                      | glyS   | C  | 80 | 9.3  | 3 |
| 28198052 | Arginyl-tRNA synthetase                                  | argS   | C  | 63 | 10.3 | 4 |
| 28198187 | Porin O precursor                                        | oprO   | OM | 45 | 13.6 | 4 |
| 28199811 | 30S ribosomal protein S18                                | rpsR   | C  | 9  | 40.8 | 2 |
| 28198173 | NADH dehydrogenase subunit C                             | nuoC   | C  | 28 | 11.6 | 2 |
| 28198336 | PmbA protein                                             | pmbA   | C  | 48 | 10.3 | 2 |
| 28199089 | Cation:proton antiporter                                 | ybaL   | CM | 60 | 10.8 | 4 |
| 28199854 | Superoxide dismutase                                     | sodM   | P  | 23 | 22.7 | 2 |
| 28198116 | 3-methyl-2-oxobutanoate hydroxymethyltransferase         | panB   | C  | 29 | 21.3 | 4 |
| 28198371 | 50S ribosomal protein L30                                | rpmD   | U  | 7  | 30.2 | 2 |
| 28199290 | Alcohol dehydrogenase                                    | yahK   | C  | 37 | 23.8 | 5 |
| 28198252 | Ribosome-recycling factor                                | frr    | C  | 21 | 33.5 | 4 |
| 28199681 | Dihydrolipoamide dehydrogenase                           | lpdA   | C  | 64 | 7.5  | 3 |
| 28199371 | Elongation factor P                                      | efp    | C  | 21 | 21.8 | 2 |
| 28199871 | 50S ribosomal protein L11                                | rplK   | C  | 15 | 12.0 | 1 |
| 28198658 | 50S ribosomal protein L13                                | rplM   | C  | 16 | 29.6 | 3 |
| 28198503 | RNA polymerase sigma factor                              | rpoD   | C  | 70 | 6.6  | 3 |
| 28198369 | 50S ribosomal protein L18                                | rplR   | C  | 13 | 29.4 | 3 |
| 28199794 | Pilus biogenesis protein                                 | pilB   | C  | 63 | 8.7  | 3 |
| 28199040 | Twitching motility protein                               | pilU   | C  | 42 | 12.0 | 3 |
| 28198527 | DNA-binding related protein                              | dps    | C  | 19 | 30.9 | 3 |
| 28199504 | Adenylosuccinate synthetase                              | purA   | C  | 47 | 9.5  | 3 |
| 28199502 | Nucleoside diphosphate kinase                            | ndk    | EC | 16 | 22.0 | 3 |
| 28198150 | Adenylate kinase                                         | adk    | C  | 20 | 23.5 | 2 |
| 28198459 | Electron transfer flavoprotein ubiquinone oxidoreductase | etfD   | U  | 60 | 4.6  | 3 |
| 28198375 | 30S ribosomal protein S11                                | rpsK   | C  | 14 | 26.2 | 2 |
| 28198185 | 3-oxoacyl-[ACP] reductase                                | fabG   | C  | 26 | 23.2 | 3 |
| 28198388 | ATP-dependent serine proteinase La                       | lon    | C  | 92 | 3.9  | 3 |
| 28198936 | ATPase                                                   | PD1039 | C  | 45 | 8.5  | 2 |
| 28198848 | Fumarate hydratase                                       | fumB   | C  | 55 | 8.1  | 2 |
| 77747623 | Phospho-2-dehydro-3-deoxyheptonate aldolase              | aroG   | C  | 41 | 13.9 | 3 |

|          |                                                      |        |    |     |      |   |
|----------|------------------------------------------------------|--------|----|-----|------|---|
| 28198404 | Malate dehydrogenase                                 | mdh    | U  | 35  | 35.4 | 6 |
| 28198517 | Aspartate-semialdehyde dehydrogenase                 | asd    | C  | 37  | 16.3 | 2 |
| 28197956 | Biopolymer transport ExbD1                           | exbD1  | CM | 15  | 25.2 | 2 |
| 77747689 | Polysaccharide export protein                        | mrp    | CM | 32  | 6.6  | 1 |
| 28198960 | Preprotein translocase subunit SecB                  | secB   | C  | 19  | 43.0 | 4 |
| 28197977 | Transcription-repair coupling factor                 | mfd    | U  | 132 | 4.4  | 3 |
| 28199058 | Peptidyl-prolyl cis-trans isomerase                  | PD1168 | OM | 25  | 14.2 | 3 |
| 28198433 | Small conductance mechanosensitive ion channel       | yggB   | CM | 34  | 19.3 | 3 |
| 28198368 | 50S ribosomal protein L6                             | rplF   | C  | 19  | 11.4 | 2 |
| 77747720 | 4-hydroxy-3-methylbut-2-en-1-yl diphosphate synthase | ispG   | C  | 45  | 15.8 | 4 |
| 28199782 | Translation initiation factor IF-3                   | infC   | C  | 21  | 12.8 | 2 |
| 28199704 | Peptidyl-prolyl cis-trans isomerase                  | surA   | P  | 51  | 10.6 | 3 |
| 28198847 | Aspartyl-tRNA synthetase                             | aspS   | C  | 66  | 10.4 | 3 |
| 28198532 | Cytochrome O ubiquinol oxidase subunit I             | cyoB   | CM | 74  | 2.9  | 2 |
| 28199323 | 50S ribosomal protein L27                            | rpmA   | C  | 9   | 25.9 | 2 |
| 28199511 | DNA-binding protein                                  | bbh3   | U  | 14  | 33.1 | 3 |
| 28198444 | Poly(Hydroxyalcanoate) granule associated protein    | phaF   | C  | 20  | 17.3 | 2 |
| 77747658 | NAD-glutamate dehydrogenase                          | gdhA   | U  | 186 | 1.6  | 2 |
| 28199878 | Ribose-phosphate pyrophosphokinase                   | prs    | C  | 35  | 5.9  | 1 |
| 77747631 | Phosphomannomutase                                   | algC   | C  | 50  | 8.8  | 2 |
| 28198330 | Outer membrane protein                               | omp28  | P  | 26  | 11.6 | 2 |
| 28198345 | ATP synthase gamma chain                             | atpG   | C  | 32  | 11.5 | 2 |
| 28198558 | Phosphoribosylformylglycinamide synthase             | purL   | C  | 144 | 5.7  | 4 |
| 28198025 | Succinyl-diaminopimelate desuccinylase               | dapE   | C  | 41  | 10.9 | 2 |
| 28198031 | Alanyl-tRNA synthetase                               | alaS   | C  | 96  | 2.4  | 1 |
| 28198600 | ABC transporter ATP-binding protein                  | ynhD   | C  | 31  | 9.7  | 2 |
| 28198952 | Outer membrane protein Slp                           | slp    | OM | 18  | 20.0 | 2 |
| 28199569 | Fimbrial assembly membrane protein                   | pilN   | CM | 25  | 14.1 | 2 |
| 28199623 | Probable malate:quinone oxidoreductase               | mqq    | C  | 63  | 11.7 | 4 |
| 77747685 | Catalase-peroxidase                                  | katG   | C  | 84  | 6.3  | 3 |
| 28198361 | 50S ribosomal protein L29                            | rpmC   | U  | 8   | 26.2 | 2 |
| 28198638 | General secretory pathway protein E                  | xpsE   | C  | 65  | 5.3  | 2 |
| 28198068 | Tyrosyl-tRNA synthetase                              | tyrS   | C  | 47  | 6.5  | 1 |

|          |                                                                  |           |    |     |      |   |
|----------|------------------------------------------------------------------|-----------|----|-----|------|---|
| 28198733 | Bifunctional purine biosynthesis protein purH                    | purH      | C  | 57  | 8.0  | 2 |
| 28198325 | Diaminopimelate decarboxylase                                    | lysC      | C  | 95  | 4.3  | 3 |
| 28199113 | Inorganic pyrophosphatase                                        | ppa       | C  | 20  | 16.9 | 2 |
| 28199043 | Putative uncharacterized protein                                 | PD1151    | OM | 31  | 16.6 | 3 |
| 28199560 | Chaperone protein ClpB                                           | clpB      | C  | 96  | 5.2  | 3 |
| 28198095 | Acetyl-coenzyme A carboxylase carboxyl transferase subunit alpha | accA      | C  | 36  | 19.1 | 4 |
| 28199809 | Chromosome segregation protein                                   | smc       | C  | 131 | 4.3  | 2 |
| 28198800 | 2,3-bisphosphoglycerate-dependent phosphoglycerate mutase        | gpmA      | C  | 29  | 13.3 | 2 |
| 28198251 | Undecaprenyl pyrophosphate synthase                              | uppS      | C  | 29  | 9.8  | 2 |
| 28197982 | Nitric oxide dioxygenase                                         | hmp       | C  | 44  | 8.1  | 2 |
| 28199255 | Heat shock protein GrpE                                          | grpE      | C  | 19  | 26.7 | 2 |
| 28198261 | 6-phosphogluconolactonase                                        | pgl       | U  | 26  | 26.4 | 4 |
| 28199883 | Peptide chain release factor 1                                   | prfA      | C  | 41  | 11.1 | 2 |
| 28198411 | Colicin V secretion ABC transporter ATP-binding protein          | cvaB      | CM | 79  | 7.5  | 2 |
| 28199563 | Putative cytochrome P450 133B1                                   | CYP133 B1 | CM | 45  | 21.6 | 4 |
| 28198026 | Asparagine synthase B                                            | asnB      | C  | 63  | 8.3  | 3 |
| 28199369 | 3-demethylubiquinone-9 3-methyltransferase                       | ubiG      | C  | 27  | 11.8 | 2 |
| 28199383 | 3-oxoacyl-[ACP] reductase                                        | fabG      | C  | 25  | 17.0 | 2 |
| 28198366 | 30S ribosomal protein S14                                        | rpsN      | C  | 12  | 18.8 | 2 |
| 28198213 | Argininosuccinate synthase                                       | argG      | C  | 44  | 11.5 | 3 |
| 28199115 | Thioredoxin domain-containing protein                            | trx       | C  | 38  | 9.7  | 2 |
| 28198011 | Dihydroxy-acid dehydratase                                       | ilvD      | C  | 65  | 7.2  | 3 |
| 28199318 | Isoleucyl-tRNA synthetase                                        | ileS      | C  | 106 | 5.1  | 4 |
| 28199677 | Membrane protein                                                 | PD1806    | CM | 29  | 13.4 | 2 |
| 28197999 | Fimbrial subunit                                                 | PD0062    | EC | 19  | 34.8 | 2 |
| 28199334 | Putative uncharacterized protein                                 | PD1453    | C  | 44  | 8.9  | 2 |
| 28199202 | Chromosome partitioning protein                                  | parA      | CM | 29  | 17.0 | 2 |
| 77747669 | Quinolinate synthase A                                           | nadA      | C  | 37  | 16.5 | 3 |
| 77747710 | (Dimethylallyl)adenosine tRNA methylthiotransferase miaB         | miaB      | C  | 55  | 8.7  | 2 |
| 28198405 | Peptidyl-prolyl cis-trans isomerase                              | ppiB      | C  | 18  | 30.5 | 3 |
| 28199780 | 50S ribosomal protein L20                                        | rplT      | C  | 14  | 16.8 | 2 |
| 28199573 | Ribokinase                                                       | rbsK      | C  | 33  | 9.1  | 2 |

|          |                                                    |        |    |    |      |   |
|----------|----------------------------------------------------|--------|----|----|------|---|
| 28199399 | Peptidyl-prolyl cis-trans isomerase                | slyD   | C  | 18 | 23.9 | 2 |
| 28199204 | Seryl-tRNA synthetase                              | serS   | C  | 47 | 9.6  | 3 |
| 28198633 | Proline iminopeptidase                             | pip    | C  | 36 | 9.9  | 3 |
| 28199173 | GTP-binding protein LepA                           | lepA   | CM | 67 | 8.3  | 3 |
| 28198562 | Acetylornithine aminotransferase                   | argD   | C  | 44 | 7.3  | 2 |
| 28199705 | LPS-assembly protein lptD                          | lptD   | OM | 91 | 2.9  | 2 |
| 28198958 | Putative uncharacterized protein                   | PD1063 | OM | 21 | 32.1 | 3 |
| 28198323 | Regulator of pathogenicity factors                 | rpfB   | CM | 63 | 7.0  | 3 |
| 28198668 | Adenylosuccinate lyase                             | purB   | C  | 51 | 7.0  | 2 |
| 28199552 | S-adenosylmethionine synthase                      | metK   | C  | 44 | 8.4  | 2 |
| 77747688 | Putative uncharacterized protein                   | PD1329 | U  | 15 | 16.0 | 2 |
| 28199860 | Putative uncharacterized protein                   | PD1994 | CM | 78 | 6.1  | 3 |
| 28198652 | Subunit F of alkyl hydroperoxide reductase         | ahpF   | CM | 57 | 8.3  | 3 |
| 28199377 | Type IV fimbriae assembly protein                  | pilZ   | U  | 13 | 32.2 | 2 |
| 28199730 | Cell division protein                              | ftsZ   | C  | 42 | 12.9 | 2 |
| 28199351 | Putative uncharacterized protein                   | PD1470 | C  | 28 | 10.9 | 2 |
| 28198974 | DNA mismatch repair protein mutS                   | mutS   | C  | 97 | 4.4  | 2 |
| 77747682 | Ferric enterobactin receptor                       | bfeA   | OM | 87 | 6.8  | 2 |
| 28199645 | Stringent starvation protein A                     | sspA   | C  | 24 | 10.9 | 2 |
| 28198552 | UDP-N-acetylglucosamine 1-carboxyvinyltransferase  | murA   | C  | 45 | 11.3 | 2 |
| 28199572 | Voltage-gated potassium channel beta subunit       | tas    | C  | 36 | 10.9 | 2 |
| 28198569 | High frequency lysogenization protein hflD homolog | hflD   | U  | 22 | 19.1 | 2 |
| 28198623 | Sulfate adenylyltransferase subunit 2              | cysD   | C  | 35 | 7.6  | 2 |
| 28199157 | Threonine synthase                                 | thrC   | C  | 46 | 4.9  | 2 |
| 28198591 | Glucosamine--fructose-6-phosphate aminotransferase | glmS   | C  | 36 | 8.4  | 2 |
| 28197957 | Biopolymer transport ExbD2 protein                 | exbD2  | CM | 15 | 32.4 | 2 |
| 28199453 | Recombination-associated protein rdgC              | rdgC   | C  | 34 | 9.9  | 2 |
| 28199717 | Glutamyl-tRNA synthetase                           | gltX   | C  | 53 | 5.4  | 2 |
| 28199174 | Signal peptidase I                                 | lepB   | CM | 30 | 8.6  | 2 |
| 28199773 | Virulence regulator                                | xrvA   | U  | 15 | 33.6 | 2 |
| 28198707 | Putative uncharacterized protein                   | PD0802 | U  | 20 | 15.7 | 2 |
| 28198260 | 6-phosphogluconate dehydratase                     | edd    | C  | 67 | 4.8  | 2 |
| 28199814 | Asparaginyl-tRNA synthetase                        | asnS   | C  | 53 | 5.8  | 2 |

|          |                                                      |        |    |     |      |   |
|----------|------------------------------------------------------|--------|----|-----|------|---|
| 28199427 | Cystathionine beta-synthase                          | cysM   | C  | 50  | 11.0 | 2 |
| 28198357 | 30S ribosomal protein S19                            | rpsS   | C  | 10  | 25.8 | 2 |
| 28199280 | GumB protein                                         | gumB   | U  | 24  | 11.1 | 2 |
| 28198667 | Putative uncharacterized protein                     | PD0761 | C  | 48  | 7.8  | 2 |
| 28198559 | Disulfide isomerase                                  | dsbC   | P  | 28  | 14.9 | 3 |
| 28198605 | Putative uncharacterized protein                     | PD0697 | CM | 11  | 18.6 | 2 |
| 28198194 | C4-dicarboxylate transport protein                   | dctA   | CM | 48  | 5.3  | 2 |
| 28199052 | Putative uncharacterized protein                     | PD1162 | C  | 47  | 3.0  | 2 |
| 28199241 | P-protein                                            | pheA   | C  | 42  | 6.4  | 2 |
| 28198038 | Valyl-tRNA synthetase                                | valS   | C  | 111 | 3.2  | 2 |
| 28198855 | Putative uncharacterized protein                     | PD0956 | U  | 37  | 8.4  | 2 |
| 28199932 | Type I restriction-modification system DNA methylase | hsdM   | C  | 89  | 4.0  | 2 |
| 28198322 | Response regulator                                   | rpfG   | CM | 44  | 8.1  | 2 |

1: Protein accession number at NCBI database (<http://www.ncbi.nlm.nih.gov/>);

2: Protein localization as predicted by PSORTb v. 3.0.2 Subcellular Localization Prediction Tool (<http://www.psort.org/psortb/>; C: Cytoplasmic; CM: Cytoplasmic Membrane; OM: Outer Membrane; P: Periplasmic; EC: Extracellular; U: Unknown);

3: Theoretical protein molecular weight shown in kDa.

## References

1. Combet, C., Jambon, M., Deleage, G. & Geourjon, C. Geno3D: automatic comparative molecular modelling of protein. *Bioinformatics* **18**, 213-214 (2002).
2. Konagurthu, A.S., Whisstock, J.C., Stuckey, P.J. & Lesk, A.M. MUSTANG: a multiple structural alignment algorithm. *Proteins* **64**, 559-574 (2006).
3. Larkin, M.A. et al. Clustal W and Clustal X version 2.0. *Bioinformatics* **23**, 2947-2948 (2007).
4. Aparna, G., Chatterjee, A., Sonti, R.V. & Sankaranarayanan, R. A cell wall-degrading esterase of *Xanthomonas oryzae* requires a unique substrate recognition module for pathogenesis on rice. *Plant Cell* **21**, 1860-1873 (2009).
5. Gouy, M., Guindon, S. & Gascuel, O. SeaView version 4: A multiplatform graphical user interface for sequence alignment and phylogenetic tree building. *Molecular biology and evolution* **27**, 221-224 (2010).
